# Supplementary material for: A Novel Defined Pyroptosis-Related Gene Prognostic Index for Clear Cell Renal Cell Carcinoma
Source: Research Square preprint supplement (doi:10.21203/rs.3.rs-919283/v1), 2021-09-30
Supplement: Supplementary file 1 [file 78416d190466bdf920dd4267.xlsx]

## Sheet: Sheet1
Table S4.Intersection DEGs of TCGA training cohort and validation cohort
upregulated genes	downregulated genes
CLMP	SLC4A9
FEZF1	FREM1
FAM106A	VWA5B1
GAPDHS	ADRB1
PSTPIP1	CDH7
KPNA7	TMPRSS11E
CRTAM	MUC17
SLC35G3	KBTBD12
OR2K2	SLC30A10
AHSA2	PSCA
OR2B6	CWH43
NKX2-5	TRIM67
PRKCG	WISP3
TBX10	CALB1
LRRC71	SLC12A3
ZAR1L	TCEAL2
PROP1	CYP1A2
RPA4	MOG
IZUMO4	CGA
CCDC88B	SFTPB
SLC38A5	PLK5
TMEM235	FXYD3
CABS1	ANTXRL
CHRM5	INHA
CCT8L2	TMEM38A
TMEM110-MUSTN1	HHATL
CXCL13	CFAP61
LBX1	GPR128
LAX1	ANKRD30B
GLRA4	TMPRSS11A
FAM209A	KRTAP5-8
LEUTX
LHB
CYP2F1
PTPN22
FAM129C
SLC26A10
CYP2D6
IQCF2
ELANE
ZIC2
UCMA
ISL1
SPAG11B
LYPD4
IFNL1
OR10A2
CST7
AC016142.1
NEIL1
GFPT2
CLEC1B
HIST3H3
CNGA3
CD38
TNFRSF9
C10orf120
FOXM1
ENSG00000261884
C7orf33
C12orf40
AIRE
AL357140.1
PIWIL3
FRMD5
PDE6C
APOC4
C17orf99
MZB1
DMRT3
SLC6A7
MRGPRD
LYZL4
PANX3
PRSS46
AC007163.2
AIPL1
NME8
MPP4
PDZD3
CEACAM16
NLRP10
NLRP5
TMEM202
AC019206.1
SLC13A4
C2orf57
LACTBL1
IDO2
CRYBA4
FKSG66
CELA3A
OR10K1
FGF8
ENSG00000261408
PPEF2
ATAD3B
IKZF3
SLX1A
SLC22A14
IZUMO2
ENSG00000280537
ENSG00000267908
IGFL4
GPR171
COL7A1
SEZ6
CAPN12
DBH
CIITA
AWAT1
PSG3
DIRC1
MYH13
GTSF1L
MMP27
DNHD1
GIPR
MLN
OR10J3
KIF14
GFI1
IL17C
LPIN3
ALPP
PTPRH
SPDYE5
PLXNB3
SH2D2A
MYOD1
FAM229A
SLC39A12
SEBOX
STRC
TEX13B
OR2B2
AURKB
GABBR1
FAM71F1
NPPA
CATSPER4
LRTM1
KCNJ6
CASP5
FSTL5
OR6A2
C20orf173
ZAN
SLC17A9
PHF21B
CARD9
CELSR3
LCN15
PCBP3
EP400NL
MS4A13
GRM6
GNRH1
ZNRF4
UPK3B
KRT77
C2orf61
PAX1
ENSG00000256950
UCN2
ANXA8
CSMD3
AC004076.7
NFKBIZ
TNFRSF17
SIRPG
TAC3
CD8A
XAF1
TMEM244
HS3ST6
IGFLR1
HYPK
VAX1
GPR174
FOXR1
MYL10
C6orf141
CD2
IL31
AGER
EME2
GABRE
NPIPB5
CACNG2
IL21R
H2BFWT
IGLL5
CLPS
AC026449.1
FAM180B
TOX
PCDH15
NPIPB7
SPAG11A
CYP4F12
C20orf141
MSS51
CALB2
MAB21L2
KIAA1024L
PAGE2
OR6S1
SPINT4
ITK
FAM153C
KLRC4
KLK12
HCG27
BSX
MEF2B
LYZL6
PLAC8L1
CD72
DRP2
SPATC1
CLLU1
TMEM225
ENSG00000198064
MAS1
APOL1
EOMES
SMIM23
FHAD1
KRT34
ASIC3
SPDYA
YJEFN3
TMEFF2
GPR18
SULT6B1
NELL2
VWA3A
DPRX
WNT10B
SP9
PI3
E2F7
BRICD5
NUF2
KRT78
IL13
MATN4
BLK
OR51B6
OR5W2
ENSG00000254553
FSD1
ENSG00000258790
RBPJL
C12orf71
WNT16
ADAMTS6
TBPL2
TNFRSF25
NPIPA3
SLAMF6
HTR3D
CCER2
RHO
AC004813.1
TRPV1
FGD2
TMEM89
FOXG1
MAGEA10
LINGO3
KRTAP5-11
FAM83A
VNN3
AC090154.1
BPIFB4
CNBD1
INSL6
SSX3
SLC35G6
ENSG00000241489
SLA2
MUC22
IL19
DOC2A
ENSG00000255339
NRN1L
WNT1
DCST1
PARP15
CDRT4
PAGE1
EGFL8
MC4R
ANKRD18B
C20orf62
SLC25A2
FP325331.1
PDIA2
ENSG00000243501
CDRT1
KRTAP10-12
SPDYE4
BGLAP
CENPE
ZIC5
CRABP2
COL11A2
C14orf183
PRR30
ENSG00000271698
EXD1
UROC1
NPIPB15
GLRA1
ADAM29
SCGB1A1
OCM2
NEUROD2
ENTHD1
ANXA10
IRX4
HSD17B3
SAG
CTRC
TULP1
TAS2R42
DNAJC5G
C1orf158
FBXW10
GOLGA6B
SFTA3
RFPL3S
CDHR4
PTPRQ
AC244230.1
OR2H2
CXCR3
RP11-934B9.3
CTLA4
CIB3
ENSG00000280675
GALP
RAB40AL
CELA3B
IZUMO3
GPR144
TBC1D21
AGAP6
SPATA3
SAPCD1
LAT
TAAR5
PIF1
2021-09-12
IL4
OR10V1
PRSS55
STK31
EPYC
RTP5
CCDC17
SP140
KLF17
VENTX
PROKR2
AWAT2
SULT1A3
RTEL1-TNFRSF6B
MCHR2
MOCOS
HEATR9
BRDT
PLAC1
PATL2
AGAP10
DCAF4L2
AL138706.2
ENSG00000267426
ANKK1
OR56B1
GSDMB
ARL5C
TEX37
LMNTD2
P2RY10
DEFB118
ANKLE1
GUCY2F
ENSG00000260286
ENSG00000243440
SLAMF7
FCRL5
PRAMEF20
FAM9A
PKD1L3
CYSRT1
RFX6
PABPN1L
IQCF3
CCDC180
GAGE10
IRGC
ASIC4
CCDC168
NLRP8
NPIPB4
ENSG00000280817
FKSG70
TNFRSF13B
SGK494
LMO7DN
LHFPL5
CCL5
BTNL2
ADAM8
NAV3
ZNF560
PLGLB1
AC008914.1
SAA4
LY6G5B
MAMDC4
SDR9C7
LRRC18
TMEM78
FAM71F2
PDCD1
RTBDN
MSLNL
GPR32
TRAF3IP3
CLEC2D
CEACAM19
ARRDC5
TRIML2
CD8B
CTRL
TGM4
ETV3L
MYOG
MEI1
ERMN
FAM25E
FAM170A
CARD17
MS4A12
ENSG00000280575
KRT25
MAPK8IP3
FOXH1
ABCB11
TRPV3
SAGE1
STX1B
SHISA7
METTL11B
RGS17
ZIM3
WFDC10B
SHOX
ICOS
RNF151
TRIM46
HLA-DOB
CD200R1
CXorf65
SBSN
DDX39B
C1orf228
NCAN
ENSG00000233024
ASMT
SHOX2
NPY4R
KCNIP2
HSF5
TEX29
NOD2
ENSG00000226321
CLEC12B
JMJD7-PLA2G4B
IL21
CD300LD
EFCAB8
NXF5
GBP5
CACNG6
HTR3E
SLC25A31
RNF222
CGB8
TREML1
ENSG00000268279
FLJ20019
ENSG00000281192
C8orf74
NAA11
SUN5
EPHA10
RESP18
HCRT
WFDC6
IRF9
KRT79
OR2Z1
OBP2B
ENSG00000248710
CHRNG
IVL
CTRB1
R3HDML
OR52N4
CKM
TMEM30C
PZP
ZBTB32
ODF4
CD3E
PAX5
FCRL1
HORMAD1
GPS2
AANAT
ENSG00000281855
GLT6D1
KHDC3L
CPNE7
IFNA21
CELA2A
CDK3
ENSG00000281676
ENSG00000278685
ITGAL
THEMIS
KRTAP21-3
SOX2
CACNA1G
ROS1
TFAP2E
KRT75
NYAP2
OR2A4
ASTL
BCL2L14
GNB3
SLFN12L
OR10AD1
C19orf80
MYB
USP29
BARHL2
TSPAN32
FKSG56
ZAP70
IL12RB1
SLFN14
TLX3
OCLM
KLK14
APOBEC3D
2021-09-14
RBFOX3
CILP
MMP13
BTLA
RP11-108K14.8
PLCB2
RHOXF1
SLC15A5
AL158839.1
AL356289.1
ENSG00000259529
KCNAB3
C16orf92
ODF3
MAGEC3
AGAP5
DSCR8
SH2D1A
CYLC2
SLX1B
LMNTD1
NANOG
KCNJ18
TUSC5
PRSS54
ENSG00000187905
ERICH6B
RTL1
BASP1
OR7C2
ODF1
AADAC
FKSG63
MAGEB18
PRORY
CCDC39
PLK1
LAIR2
DDX47
KRT13
LCT
PAQR6
VAMP1
MUC16
ACRC
ENSG00000281039
CEACAM20
TEX40
PON1
NEUROG3
POU2AF1
ENSG00000281126
SEMA3A
CABP5
TMC2
C15orf43
TAS1R3
FAM72B
C12orf50
A3GALT2
TLX2
ZPBP2
CGB5
FAM183B
ZNF692
DUSP2
ENSG00000267120
FSCN3
SEC31B
KIF18B
CACNG7
NPIPB8
IFITM5
CELF6
NTNG2
ENSG00000280684
SRPK3
ZNF716
CSTL1
FANCD2OS
FCRL3
PRAMEF17
COX7B2
CCDC83
LAG3
ARHGAP33
GPR151
NOTUM
SPACA3
GIP
UBQLNL
RNF113B
ISL2
CACNA1B
CXorf67
SLC7A14
HTR3C
RP3-461F17.3
RP11-793H13.10
MYBL2
IL31RA
CCDC155
TAC4
FKSG48
SIX3
GZMK
DNAH1
BPIFC
KLRC2
PHOX2B
TRAT1
LY6G6C
EPPIN
PAGE2B
SAMD7
NPAP1
CHKB
SCNN1D
NKG7
ZSCAN10
ATHL1
DCD
NLRP13
ATP2A1
AQPEP
MAP4K1
ZNF80
ERN2
FNDC7
SPINT3
NPIPB11
SEC14L3
CCNL2
MYBPC3
MYPN
POU5F2
ENSG00000251537
TTC24
OR1K1
CDH18
WFDC10A
TIFAB
TIGIT
DEFB124
SLX1A-SULT1A3
KLRK1
OR1J1
P2RX5
LTB4R2
ST8SIA1
RSRP1
JAKMIP1
INSL5
UNC13D
DCDC2B
CFHR4
TMC8
MPO
NTF4
GOLGA8A
ITPKA
HSD3B1
AC110615.1
ZGLP1
MS4A8
RSPO4
CD27
ADAMTS14
CHAT
NLRP7
PRR25
CPT1B
DCST2
IL22
HSF4
FCRL2
GOLGA6L2
GPR45
SULT2A1
CIDEA
CTRB2
CNTNAP4
DPPA3
PYHIN1
CIDEC
CYP2E1
TICRR
SPTBN5
CATSPERD
ENSG00000279624
CGB2
NEUROD1
CENPA
OTP
LCTL
TBC1D26
DCAF8L2
OR5C1
BHMG1
HHIPL2
CYP2A13
UGT1A4
RUFY4
SSTR3
RDH16
LENG8
RGR
SPANXB2
WFDC13
SIT1
DEF6
U2AF1
CD3D
DQX1
ARMC12
VCX
RETNLB
ENSG00000272916
PMCH
PSG1
ENSG00000167807
KIAA1875
GREM1
LELP1
CRYGB
KERA
NPIPB3
DEFB131
BTG4
IGFL2
ZBP1
LGALS14
TNFRSF13C
IRG1
POLQ
DDX4
C5orf58
AZU1
ATG16L2
STX16-NPEPL1
LCNL1
CLEC6A
SENP3-EIF4A1
EFCAB3
SLC35G5
AC055733.1
ADCY10
ENSG00000268223
IL27
RSPH6A
FAM26F
IL6
TROAP
PTPN7
KRTAP10-11
BATF
NANOS2
ENSG00000281182
FBXO43
AC087762.1
MAST1
HMGA2
FAM179A
TSGA10IP
UBAP1L
FAM186A
UBASH3A
ZNF831
CA7
GPR31
ACAP1
PLIN1
OR51I1
SSPO
IRF4
OR2AT4
NANOGNB
ENSG00000260729
FAM92B
SHD
FASLG
FMR1NB
DKFZp434P228
PRDM8
RFPL4AL1
KREMEN2
RNF207
CCDC154
CCDC84
ZDHHC11
PLA2G2F
C11orf21
SFRP5
MS4A1
TMEM155
MIXL1
CCR8
PILRB
SPDYE2B
CNR2
ACTL6B
IL2RA
CRX
KRT73
PRG4
ARHGAP9
ITGA2B
FOXL2NB
AL589743.1
CDCA3
MSH5
TCN1
CNIH2
H1FNT
KIAA0907
CD80
OR9A4
GLYATL3
LYG2
BCL2L2-PABPN1
C11orf40
OTX2
SLC5A5
ENSG00000243696
PSG2
GAL3ST2
GZMA
OR3A3
PABPC1L
GPR115
ANKFN1
UBE2C
CLECL1
IQCF1
APOBEC1
ANXA8L1
LHX3
ENSG00000169203
EIF4A1
CD79A
STRA8
IFNK
DAZL
C16orf90
AC008810.1
GPR152
C11orf87
ACSM4
TBR1
IFNG
TGM6
ENSG00000281370
PRSS50
VHLL
NPEPL1
LENEP
AL354828.2
TBC1D10C
APOBEC3H
AMH
CACNG3
IL36A
OR10W1
C15orf53
COL2A1
IFI30
CCDC105
SPACA4
ENSG00000261915
CLPSL1
KLRC4-KLRK1
ENSG00000274512
KLRC3
CSAD
AL109659.1
CXCL9
CD19
GBP6
SSX1
OTUD6A
MRGPRX3
MXD3
OR5A1
OR2B3
CABP2
HSH2D
LCE6A
MS4A4E
PANX2
TMPRSS11F
WFDC11
FCRL4
TBX20
NPSR1
TTLL3
TMEM249
MS4A18
OR2G3
ENSG00000273154
CRYGS
KCNH5
GPC2
SALL4
CLEC12A
CD3G
HJURP
FAM133A
ENSG00000281523
LCE5A
OR4C6
MKRN3
CLEC19A
DNASE1L2
DSCR4
SPATA21
AL591806.1
OFCC1
OR2D3
PSORS1C2
TLR9
ENSG00000269741
DTHD1
OR5AK2
BEST2
SLITRK1
DMRTC2
PGC
FGF3
BTBD19
KLK10
PADI6
ERAS
ENSG00000159753
CT45A1
CPA5
AMY2B
PSG6
GCG
DAOA
AC242988.1
ZBED2
SEC14L4
RD3L
CATSPER2
CCR5
FABP12
MYO1G
SAP25
ORM2
FKSG68
PAX3
RNF224
HPX
C7orf34
OR52N2
LPPR3
CCL25
AIM2
CHRNA9
OCSTAMP
SLC16A8
AC004953.1
ENSG00000281446
OCM
OR11A1
ADAMTS10
HIST2H2BF
SIGLEC11
IL11
DEFB123
SUMO4
FAM193B
RGPD1
AC008622.1
TBC1D29
IL20RB
PPFIA4
GUCA1A
PLA2G2E
LTA
IFNB1
PEX5L
PLA2G4B
KLK11
DNER
MAGEB1
GOLGA6A
CRYGA
POPDC3
SERPINI2
OR8S1
TNFSF14
PRRT2
CA6
PRSS53
AC104981.1
MYH7B
KCNN4
GAD1
JPH3
CLDN18
OR51A7
RP11-546B8.6
OR10G2
CALML6
TAS2R20
CNPY1
STAG3L5P-PVRIG2P-PILRB
SCML4
AC016577.1
OR4K2
TTC16
MYBPHL
C17orf47
GATA4
MS4A14
OVOL3
ANKRD23
ZNF645
AC114494.1
GALNTL5
TCP10L2
PPP1R27
CRISP1
TNNT1
CSF2
CHKB-CPT1B
GHRH
GOLGA8B
KCNA7
HMSD
CXorf22
